# Supplementary material
Source: publisher figshare collection journal article supplement (https://gsapubs.figshare.com/ndownloader/files/25302152)
Supplement: Supplementary file 1 [file 25302152]

## Sheet: Selected taxa >5-10%
Table S4. Diatom species or genera abundance (valves counted in leftmost table;					~Depth (cm) from surface in (compacted) vibracore S --->
species percentages in rightmost table) for the most common taxa in core S*					~Depth (cm) in (compacted) vibracore S from top of uppermost core segment --->																										Contact A ------->															Contact B ------->
		Salinity	Measured		25	26	27	28	29	30	31	32	33	34	35	36	37	38	39	40	41	42	43	44	45	46	47	48	49	50	51	52	55	57	58	59	60	61	62	63	64	65	66	66	67	68	69	70	72
Latin species or genera name	Life form	preference	salinity range#	References	0	1	2	3	4	5	6	7	8	9	10	11	12	13	14	15	16	17	18	19	20	21	22	23	24	25	26	28	32	34	35	36	37	38	39	40	41	42	43	44	45	46	47	48	49
Encyonema mesianum (Cholnoky) D.G.Mann	Benthic	Freshwater		Krammer & Lange-Bertalot (1986)	1		2	1						7	6	8		1			1	4	11	1	1		3	1	1	2					1					6		3		2
Encyonema minutum (Hilse) D.G.Mann	Benthic	Freshwater		Krammer & Lange-Bertalot (1986)			2	1			1	3		6	1	5	3	3	1	5	1	3	5	6			1		1				3							1		2		1
Epithemia spp.	Epiphytic	Freshwater		Vos & de Wolf (1988), Patrick & Reimer (1975)															1
Eunotia praerupta Ehrenberg	Benthic	Freshwater		Patrick & Reimer (1966), Krammer & Lange-Bertalot (1991a)			1		1					1			1																						1	1
Eunotia spp.	Benthic	Freshwater		Patrick & Reimer (1966), Krammer & Lange-Bertalot (1991a)											1
Gomphoneis mammilla (Ehrenberg) Cleve	Benthic	Freshwater		Patrick & Reimer (1975), Kociolek & Rosen (1984)										3				3
Gomphonema parvulum (Kützing) Kützing	Benthic	Freshwater		Patrick & Reimer (1975)	1	2	3				2			7	9	1	4		1	6	3	5	1	4		6	4	9	2		1	3	1					1		3		1	2	1		3			2
Pinnularia notabilis Krammer	Benthic	Freshwater		Krammer (2000)
Planothidium lanceolatum (Brébisson ex Kützing) Bukhtiyarova	Benthic	Freshwater	5.7±4.7	Patrick & Reimer (1966)	3	4	4	14	5	2	13	1	1	22	24	51	7	7	15	3		7	52	3	13	11	8	7	2		12	5	40	11		3	1			51	1	2	13			11	20	5
Stauroneis phoenicenteron (Nitzsch) Ehrenberg	Benthic	Freshwater		Patrick & Reimer (1966)																													1
Ulnaria ulna (Nitzsch) Compère	Benthic	Freshwater		Patrick & Reimer (1966)	3			1						8	4	3			2	3	2		1	1	1				1				1	1	1				1				1						1
Hannaea arcus (Ehrenberg) R.M.Patrick	Benthic	Freshwater		Patrick & Reimer (1966)			1					2		6	10	29		1	1	4	2	13	42	1	6		2	2		1											1						7
Cocconeis placentula Ehrenberg	Epiphytic, epilithic	Freshwater-Brackish	2.4±5.6	Vos & de Wolf (1988), Snoeijs (1993)	3					2				8		1					2		1	6	1	1	4	3	2	10			25					1			1
Cocconeis placentula Ehrenberg var. euglypta (Ehrenberg) Grunow	Epiphytic, epipsammic	Freshwater-Brackish		Krammer & Lange-Bertalot (1991), Snoeijs & Balashova (1998)	4					1				1	1	1		1					1
Cosmioneis pusilla (W.Smith) D.G.Mann & A.J.Stickle	Epipelic, aerophile	Freshwater and Brackish	5.4±3.7	Vos & de Wolf (1988), Sawai et al. (2016), Snoeijs & Potapova (1995)	59	36	43	16	36	25	27	10	41	29	17		24	29	3	6					7	17	6	5		1	21	4	1	26	33	11	31	13	31	20	34	7	19	25	24	20	9		3
Frustulia vulgaris (Thwaites) De Toni	Benthic	Freshwater and Brackish	5.5±5.6	Krammer & Lange-Bertalot (1986), Lange-Bertalot (2001)		3	4					1	3		3									3							3	1		2	1			5			1			1	6
Pinnularia lagerstedtii (Cleve) Cleve-Euler	Aerophilic	Freshwater-Brackish	5.6±3.8	Krammer (2000), Sawai et al (2016)	21	21	26	14	18	15	26	15	14	11	7		10	32	9	21	4	2		6	3	25	27	12	11	6	12	8		32	23	18	14	23	28	6	20	15	26	24	19	16	21	20	35
Gomphonema gracile Ehrenberg	Benthic	Freshwater and Brackish		Patrick & Reimer (1975)											2	1			1			1			1			2	4												1	1		1
Luticola mutica (Kützing) D.G.Mann	Epipelic, aerophile	Freshwater and Brackish	6.5±4.6	Patrick & Reimer (1966), Sawai et al. (2016), Vos & de Wolf (1988)	58	58	36	85	44	94	79	102	40	51	28	14	67	63	53	30	33	9	4	17	25	33	59	53	30	2	59	40		31	43	53	27	18	27	31	33	50	30	23	24	29	11	43	45
Navicula pseudolanceolata Lange-Bertalot	Benthic	Freshwater-Brackish	6.7±5.9	Lange-Bertalot (2001), Sawai & Nagumo (2003),			2	1	12	7		1	11		5	3				15	1	8		11			8	6	10	8	9	1					1		7										1
Navicula rhynchocephala Kützing	Epipelic	Freshwater-Brackish	7.5±11.8	Patrick & Reimer (1966), Snoeijs (1993), Vos & de Wolf (1988)		1									4		1			1	4	17		13	7	6		9	7	3	1	1		3			1	4					3					1	1
Navicula libonensis Schoeman	Epipelic?	Freshwater and Brackish	8.7±6.6	Sawai & Nagumo (2003), Witkowski et al (2000)	1		1						2									8		3	1	1								1					2		1	2					2
Diploneis smithii (Brébisson) Cleve	Epipelic	Freshwater and Brackish	10.0±7.3	Patrick & Reimer (1966), Snoeijs & Vilbaste (1994)	3	1			3	2	9	3	7	3			2	1	1	1	1		2			1	5	3	1	9	3	1	1			18	1	3	1	1	1	2	4	4	2	2	3		1
Caloneis bacillum (Grunow) Cleve	Epipelic	Freshwater and Brackish	10.4±7.8	Patrick & Reimer (1966), Vos & de Wolf (1988)	2				7	3	8	5	29		5		20	29	63	56	46	7	1	40	43	13	13	56	43	71	31	34	2	8			1				1	2	4	7	4	3	7	1
Navicula tenelloides Hustedt	Aerophilic	Freshwater-Brackish	10.7±5.1	Lange-Bertalot (2001), Patrick & Reimer (1966), Sawai & Nagumo (2003)	3				2	1			2		1				1	7			4			1	3	2		2		14		1	2	12	1	1	1		2	9		1	4				3
Nitzschia sigma (Kützing) W.Smith	Epipelic	Freshwater-Brackish	12.8±7.2	Hendy (1964), Snoeijs & Vilbaste (1994), Vos & de Wolf (1988), Witkowski et al (2000)			7			1	3	1	8				8	10	10	15	10	6		20	36	5	1	4	3	2	3	2			2		2	5	5		1		2	8	5		4		4
Gyrosigma eximium (Thwaites) Boyer	Epipelic	Freshwater-Brackish	15.1±5.3	Patrick & Reimer (1966), Sawai et al (2016), Snoeijs & Vilbaste (1994)	1				1				1																	1								2								1	1		1
Tabularia fasciculata (C.Agardh) D.M.Williams & Round	Epiphytic	Freshwater-Brackish	17.7±5.5	Patrick & Reimer (1966), Snoeijs (1993), Vos & de Wolf (1988)	3	2					4	1		1	3	1	1		2	1			1	12		7			1	3	6	5		3	3	1	4		5	5	1	5	4	3		10	7	5	8
Rhoicosphenia abbreviata (C.Agardh) Lange-Bertalot	Epiphytic	Freshwater-Brackish		Lange-Bertalot, H. (1980), Vos & de Wolf (1988)		6		1		2	10	2	2	6	18	24	6	7	3	2	5	4	12	11	2	6	2	7	8	13	16	3	23	9	2		5	5	1	24	3	3	4	4		3	3	2	2
Nitzschia pura Hustedt	Benthic	Freshwater-Brackish	10.0±5.8	Krammer & Lange-Bertalot (1988), Sawai & Nagumo (2003), Sawai et al. (2016)					3	5		6	2		7	3	4		4	2	1		2	10			3	2			1	2		7	1	1			3	1	1	1		3	5	2			1
Navicula gregaria Donkin	Epipelic, eplithic	Freshwater-Brackish	13.5±5.2	Snoeijs & Vilbaste (1994), Sawai & Nagumo (2003)	2		2	1		1						5			2				15	7		1	6	1	2	7	3	7		2	11	4			3	13	18	18	3				7	1	1
Navicula cryptotenella Lange-Bertalot	Benthic	Freshwater-Brackish	14.3±6.5	Lange-Bertalot (2001), Sawai & Nagumo (2003)	4			2													1		1	1	2						1		2				1	5	1	2	2	1	14		10	6	2	12	3
Navicula cincta (Ehrenberg) Ralfs	Epipelic, aerophile	Brackish	6.6±4.6	Sawai et al (2016), Vos & de Wolf (1988), Witkowski et al (2000)	28	25	26	23	29	17		6	4	5	8	1	9	3	1	6	3	1	1		3	6	8	1	4		1	2	2	16	21	29	14	6	22	6	31	17	11	13	11	16	13	25	15
Tryblionella debilis Arnott	Epipelic	Brackish	8.2±5.1	Sawai & Nagumo (2003),Sawai et al. (2016)	3	10	14	6	26	28	3	16	42	15	1	8	17	11	17	9	4	1		3	1	2	10	2			5	9			2		5	18	3	2		3	13	11	56	13	2	19	6
Nitzschia scalpelliformis Grunow	Epipelic	Brackish	8.4±6.7	Snoeijs & Balashova (1998), Witkowski et al (2000)	1			1	1	1	1	1	3		5					2	2			1				1	4	6	1	2		10							2	1			3
Denticula subtilis Grunow	Benthic	Brackish	8.8±7.0	Patrick & Reimer (1975), Sawai & Nagumo (2003)	1	10	6	17	8	4		26	1					3	1	5	1		3	8	7	34	15													2			3
Caloneis westii (W.Smith) Hendey	Epipelic	Brackish	13.8±5.2	Hendey (1964), Sawai & Nagumo (2003)	1								2						3		4			3	10			2	3	4				2			1	4	1		1					1
Cyclotella striata (Kützing) Grunow	Plankton	Brackish		Vos & de Wolf (1988)		2			1	2	6	8	2	13	8	7	5	4	4	4		3	4			1	1	1			1						1	1		1			1	1		1			1
Navicula salinarum Grunow	Epipelic	Brackish	14.2±6.1	Vos & de Wolf (1988)		1		2	1	2			1		1				3	6	7		3	1	5	1		3	7	16	3	11			1	1	1		1		3	6	1		4	1			5
Navicula eidrigiana J.R.Carter	Benthic	Brackish		Witkowski et al (2000)											16		8		9	14	2	13		4	7	2	6																1
Fallacia tenera (Hustedt) A.J.Stickle & D.G.Mann	Epipelic	Brackish	15.3±4.6	Snoeijs & Potapova (1995), Witkowski et al (2000)												2	1				6	1			3	1	6	6	7	9	2	1	2			17	9	18	4	14	7	24	6			1	2		1
Diploneis interrupta (Kützing) Cleve	Epipelic, aerophile	Brackish	16.5±3.8	Vos & de Wolf (1988), Witkowski et al (2000)	1																										1												1				1
Tryblionella apiculata Gregory	Epipelic	Brackish	16.9±6.9	Hendy (1964), Snoeijs & Vilbaste (1994), Vos & de Wolf (1988), Sawai et al. (2016)					1								4				1							1	2					7	2	1		1	2			1			1	6		3	4
Tryblionella pararostrata (Lange-Bertalot) Clavero & Hernández-Mariné	Epizoic, epilithic and epipsammic?	Brackish-Marine	19.8±3.5	Pantazidou et al. (2006), Witkowski et al (2000), Sawai et al. (2016)	4	11	6	13	11		1	15	8	3			9	2	21	15	8				4	9	3	3	1		10	1			1	1	1	7	1				1	20	3	6	6	2
Rhoicosphenia linearis Østrup	Benthic	Brackish-Marine		Levkov & Nakov (2008), Levkov et al (2010), Witkowski et al (2000)	7	1		3	1			1		3	1		1	1					1		1	5				1	3			3	1		1				1		2	8	1
Navicula peregrina (Ehrenberg) Kü tzing	Epipelic	Brackish-Marine	10.9±7.4	Vos & de Wolf (1988), Witkowski et al (2000), Sawai et al. (2016)				1	2											1	3	17			2										1									1
Planothidium delicatulum (Kützing) Round & Bukhtiyarova	Epipsammic, epipelic	Brackish and Marine	13.3±5.8	Vos & de Wolf (1988), Sawai et al (2016)		1			1		1		1								18			2					6	1						4	4	6	1	1		8	1	19	13		2	2
Nitzschia bilobata W.Smith	Benthic	Brackish-Marine	14.3±5.5	Hendy (1964), Witkowski et al (2000)	1		1		3				13	1	1				1	3	4		1	1	3	1		3		2						1								1		1	1		1
Paralia sulcata (Ehrenberg) Cleve	Tychoplanktonic	Brackish-Marine	17.0±6.0	Crawford (1979), Sawai et al (2005)			6					1	1	1		1		7	2	1	1		1	1	3	2		2		5	17	7		31	14	18	29	44	26	3	10	8	3	8	2	2
Thalassiosira spp.	Plankton				4	1			6		17	4	1	3	5	1	1	4	4	3	2	4	10	3	5	3		2	2	13	6		9	28	15	7	5	8	4	19	3	4	13	1	7	2	1		9
Tryblionella granulata (Grunow) D.G.Mann	Epipsammic, epipelic	Brackish and Marine		Witkowski et al (2000)								1																									3	1	4	1	1			2					2
Rhaphoneis surirella (Ehrenberg) Grunow; Rhaphoneis surirella var. australis Meunier	Benthic	Brackish and Marine		Hendy (1964), Vos & de Wolf (1988)						1	4	1	1	1	1	1	3	3	2	1		2		1		2		1		2	1	1	1	1	4	2	6	3	7	1	2	3	2	2	9	19	6	2
Fallacia ny (Cleve) D.G.Mann	Benthic	Marine	12.2±4.7	Witkowski et al (2000)		1		1								1			2	2	1	1	2	1	2	2	3		6	2	4	3	2	6	14	7	8	16	13	3	11	10					3	1
Pinnularia sp.-1					16	21	27	18	6	13	11
Pinnularia sp.-2																																								1
Navicula sp.-1															18	34	11	5	7	2		19	34	13		11	14	14	16	22	13			8						12	11					2	11
Rhaphoneis sp.-1														18																				2	2		1				6		3	14	13		17
Fragilariaceae sp.-4					3			8					2	2	1			1	5			3	8		3		2	5		7	6	1	1	5	10	20	23	11	15		27	9	78	24	6	38	56	54	50
Fragilariaceae sp.-9
Fragilariaceae sp.-12										3	1	2				2	1	2	2		1	2			4		2		3		4			2	3	6			3	6		10	2	8	3	3	6	11	5
Fragilariaceae spp. (girdle view)																						4							6		6					6			9					3
Gomphonema spp.
* Counts for all species are shown on Table S3. Number of samples with species >5% and species >10% listed in rightmost columns of the leftmost table.				Sum of valves used for paleoecologic interpretation -->	242	218	220	230	229	232	227	235	245	235	222	208	228	233	257	252	185	165	224	218	212	216	225	231	196	231	266	169	117	258	214	241	202	230	233	237	239	228	271	244	235	218	231	209	211
All species listed in this table (>5% in 5 or more samples), except those whose ecology is unknown, were used for paleoecologic interpretation (e.g., Horton et al., 2007; Watcham et al., 2013).
Species are listed by general salinity preference (colors match those of Figure 11) and in the order of the salinity measurements for modern species of Sawai et al. (2016).
	= species >10% in 6 or more samples, as listed on Figure 11
	= species not used for interpretation because their ecology is unknown
# Salinity range (weighted average and standard deviation) measured by Sawai et al. (2016; unpublished values from the same dataset are listed in italics).
~Lower sample numbers correspond with sampling depths in the compacted vibracore (25% compaction) as measured from the top of the uppermost core segment. Samples were 4-8 mm thick. Upper numbers are depths in the compacted vibracore below the marsh surface.
On Figures 5 and 6, depths of units and contacts are shown at their estimated true (uncompacted) depths based on correlative lithologies and contacts in gouge cores within 10 m of core S.
[truncated: 227 more columns]
